# Supplementary material for: Evaluation of Myeloperoxidase as Target for Host-Directed Therapy in Tuberculosis In Vivo
Source: MDPI journal article supplement (doi:10.3390/ijms23052554), 2022-02-25
Supplement: s1 [file s1]

| Score | Activity    | Bodyweight            | General conditions                                                               | Behaviour                                                                                         |
|-------|-------------|-----------------------|----------------------------------------------------------------------------------|---------------------------------------------------------------------------------------------------|
| 1     | Very active | No change or increase | Fur glossy and glowing, clean orifices of the body, eyes clear and glossy        | Normal                                                                                            |
| 2     | Active      | Loss of < 10%         | Reduced or abnormal body hygiene, uneven fur                                     | Little changes                                                                                    |
| 3     | Less active | Loss of 10 - 20%      | Dull, unkempt fur, unkempt orifices, elevated tonic                              | Unusual, reduced motor functions or hyperkinetic                                                  |
| 4     | Not active  | Loss of 20 - 30%      | Dirty fur, clotted orifices, abnormal body position, eyes cloudy, elevated tonic | Self-isolation, lethargic, pronounced hyperkinetic, coordination disorder, behavioral stereotypes |
| 5     | lethargic   | Loss of > 30%         | Cramps, paralysis in extremities and torso, breathing noises, cold body          | Pain during handling, self-amputation (auto aggression)                                           |

**Suppl. Table S1:** Scoring system. After aerosol infection with ~100-150 CFU of H37Rv, mice were scored daily from day 25-35 after infection.
